# Supplementary material for: Infection-exposure in infancy is associated with reduced allergy-related disease in later childhood in a Ugandan cohort
Source: eLife. 2021 Sep 22;10:e66022. doi: 10.7554/eLife.66022 (PMC8457824; doi:10.7554/eLife.66022)
Supplement: Supplementary file 1. — (a) Model fit statistics for latent class analysis at year 1 and at year 5 considering cumulative infection experience. (b) Results for measurement invariance by sex, at year 1 and at year 5. [file elife-66022-supp1.docx]

**Supplementary file 1a:** Model fit statistics for Latent Class Analysis at year 1 and at year 5 considering cumulative infection experience

|  | **G2a** | **AICb** | **BICc** | **CAICd** | **ABICe** | **Entropy** | **DFf** |
| --- | --- | --- | --- | --- | --- | --- | --- |
| **Year 1** |  |  |  |  |  |  |  |
| 2-class solution | 126.22 | 160.22 | **256.88** | **273.88** | **202.87** | 0.39 | 238 |
| 3-class solution | 95.27 | **147.27** | 295.11 | 321.11 | 212.51 | 0.56 | 229 |
| 4-class solution | 80.24 | 150.24 | 349.26 | 384.26 | 238.06 | 0.38 | 220 |
| 5-class solution | 70.89 | 158.89 | 409.09 | 453.09 | 269.29 | 0.35 | 211 |
| 6-class solution | 61.69 | 167.69 | 469.08 | 522.08 | 300.69 | 0.46 | 202 |
| 7-class solution | 53.52 | 177.52 | 530.09 | 592.09 | 333.11 | **0.57** | 193 |
| **Year 5** |  |  |  |  |  |  |  |
| 2-class solution | 46.43 | **80.43** | **173.71** | **190.71** | **119.70** | 0.33 | 238 |
| 3-class solution | 29.67 | 81.67 | 224.34 | 250.34 | 141.74 | 0.54 | 229 |
| 4-class solution | 21.85 | 91.85 | 283.9 | 318.90 | 172.71 | 0.54 | 220 |
| 5-class solution | 14.83 | 102.83 | 344.3 | 388.26 | 204.48 | 0.60 | 211 |
| 6-class solution | 10.09 | 116.09 | 406.9 | 459.91 | 238.53 | **0.63** | 202 |
| 7-class solution | 6.45 | 130.45 | 470.7 | 532.66 | 273.69 | 0.59 | 193 |

Bold indicates the best solution model for the corresponding fit index.

aG2 is the likelihood ratio statistic.

bAIC is Akaike Information Criterion.

cBIC is Bayesian Information Criterion.

dCAIC is consistent AIC.

eABIC is adjusted BIC.

fDF is degree of freedom.

**Supplementary file 1b:** Results for measurement invariance by sex, at year 1 and at year 5

|  | **MIa** | **G2b** | **DFc** | **Diff.G2d** | **Diff.DFe** | ***P*-value** |
| --- | --- | --- | --- | --- | --- | --- |
| Year 1 | Yes | 220.34 | 493 | 17.11 | 16 | 0.379 |
|  | No | 203.23 | 477 |  |  |  |
| Year 5 | Yes | 83.43 | 493 | 14.55 | 16 | 0.558 |
|  | No | 68.88 | 477 |  |  |  |

aMI is Measurement invariance

bG2 is the likelihood ratio statistic.

cDF is degrees of freedom.

dDiff.G2 is the difference of likelihood ratio statistics.

eDiff.DF is the difference of degrees of freedom.
